# Supplementary material for: Molecular dynamics exploration of the barrier properties of small gas molecules in the semicrystalline parylene C
Source: Royal Society of Chemistry journal article supplement (doi:10.1039/d4cp04226c), 2025-01-01
Supplement: d4cp04226c1.pdf [file d4cp04226c1.pdf]

Supplementary Information for  
Molecular Dynamics Exploration of the Barrier Properties of Small Gas Molecules in  
the Semicrystalline Parylene C

*Shuo Li<sup>a#</sup>, Zhiyu Xue<sup>b#</sup>, Xin Wang<sup>a,\*</sup> and Dingguo Xu<sup>a,\*</sup>*

<sup>a</sup> MOE Key Laboratory of Green Chemistry and Technology, College of Chemistry,  
Sichuan University, Chengdu, Sichuan 610064, PR China

<sup>b</sup> School of Materials and Energy, University of Electronic Science and Technology of  
China, 611731, Chengdu, China

#Both authors contributed equally

\* Corresponding author:

E-mail: wangxin@scu.edu.cn (X.W.) and dgxu@scu.edu.cn (D.X.)

## Contents

|                                                                                                                                                     |     |
|-----------------------------------------------------------------------------------------------------------------------------------------------------|-----|
| <b>Fig. S1</b> Initial structures of parylene C model.....                                                                                          | S3  |
| <b>Fig. S2</b> Final structures of parylene C model .....                                                                                           | S4  |
| <b>Fig. S3</b> The crystalline region and the amorphous region.....                                                                                 | S5  |
| <b>Fig. S4</b> Schematic diagram of the whole simulated annealing and MD relaxation, temperature change, potential energy and density evolution.... | S6  |
| <b>Fig. S5</b> The averaged adsorption of H <sub>2</sub> in 30% crystallinity parylene C..                                                          | S7  |
| <b>Fig. S6</b> The temperature dependence of density .....                                                                                          | S8  |
| <b>Fig. S7</b> The snapshots of O <sub>2</sub> and H <sub>2</sub> absorbed in parylene C .....                                                      | S9  |
| <b>Fig. S8</b> The diffusion trajectory of gases .....                                                                                              | S10 |

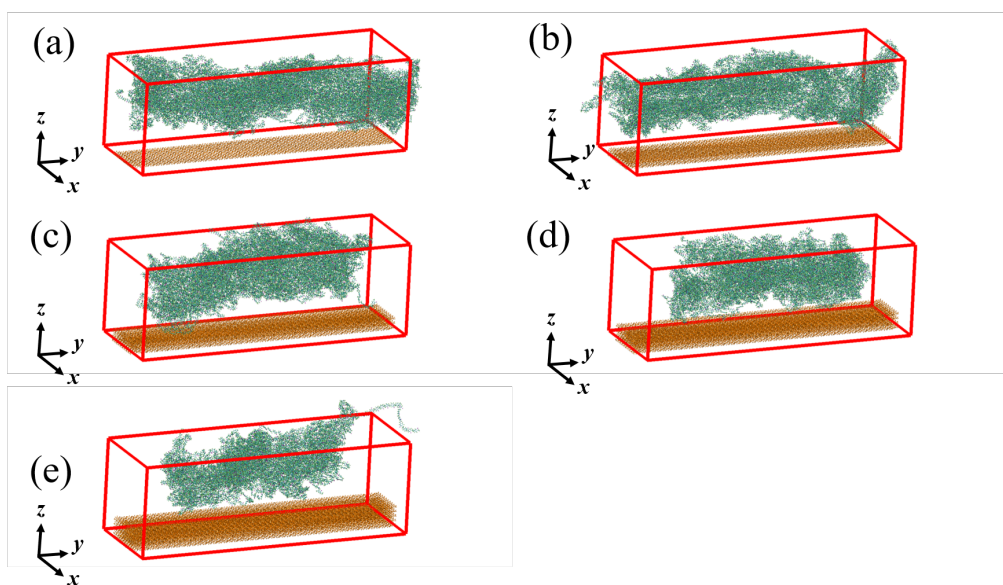

**Fig. S1** Initial structures of parylene C models which contain 10%-50% aligned chains. (a) 10%; (b) 20%; (c) 30%; (d) 40%; (e) 50%.

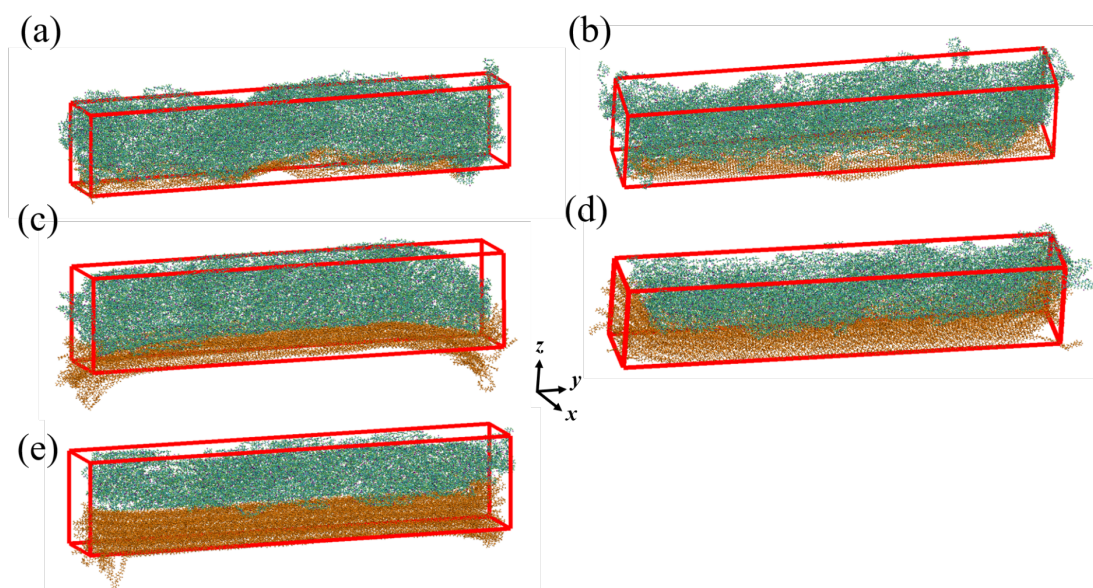

**Fig. S2** Final structures of parylene C models with 17%-44% crystallinity. (a) 17%; (b) 24%; (c) 30%; (d) 34%; (e) 44%.

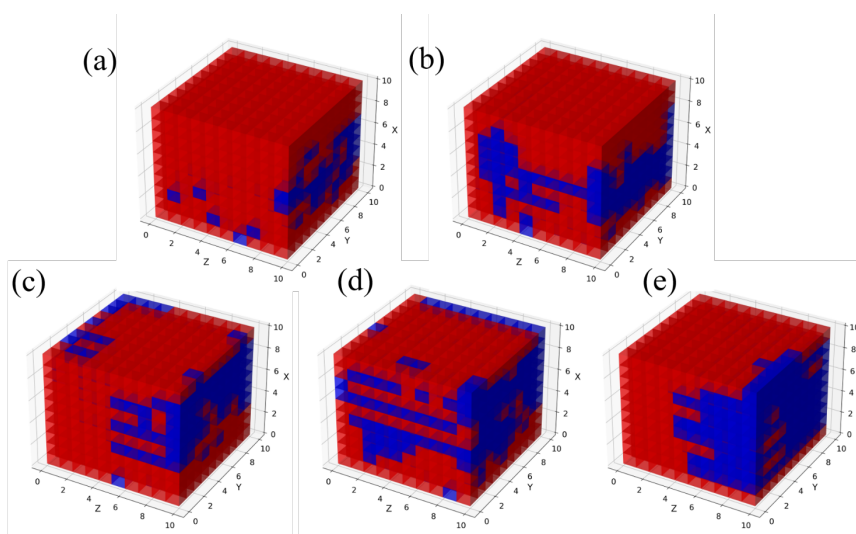

**Fig. S3** The crystalline region (blue) and the amorphous region (red) in semi-crystalline parylene C with 50% transparency. The X-, Y- and Z-axis are defined as the number of bins. (a) 17% crystallinity; (b) 24% crystallinity; (c) 30% crystallinity; (d) 34% crystallinity; (e) 44% crystallinity.

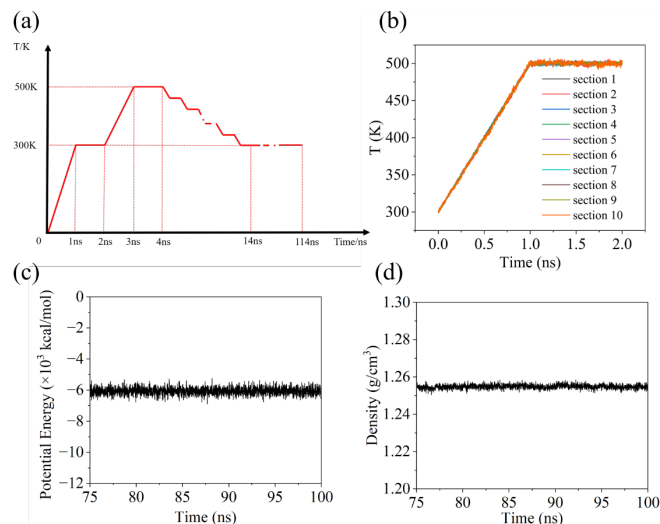

**Fig. S4** (a) Schematic diagram of the whole simulated annealing and final 100 MD simulation. (b) Temperature change in the process of heating up and high temperature equilibrium using the 17% crystallinity parylene C as an example. (c) Potential energy evolution along the time course using the 17% crystallinity parylene C as an example. (d) Density evolution along the time course using the 17% crystallinity parylene C as an example.

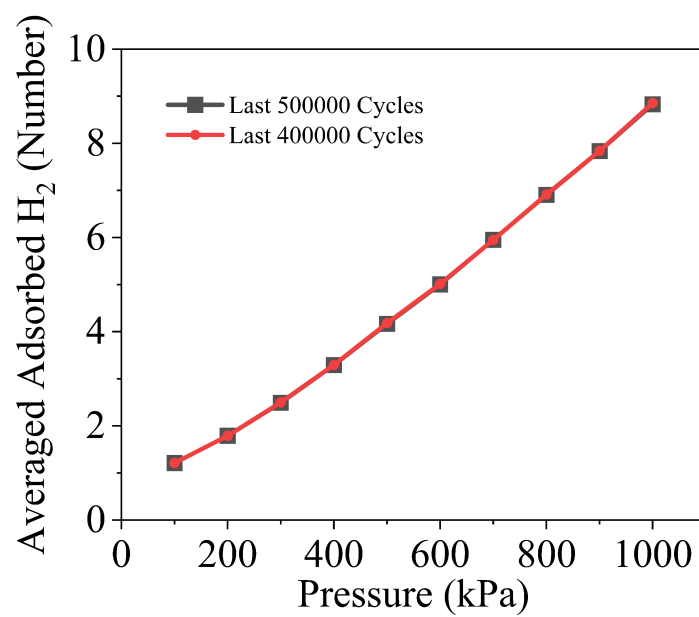

**Fig. S5** The averaged adsorption of H<sub>2</sub> in 30% crystallinity parylene C.

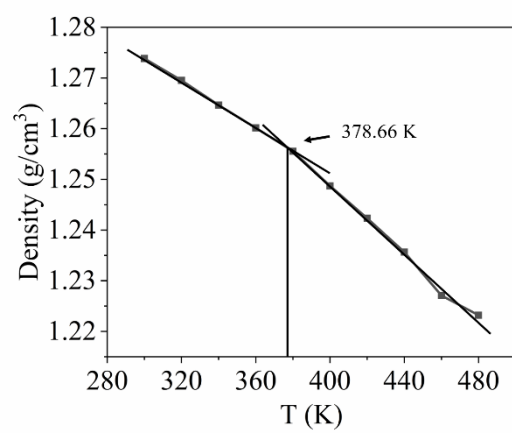

**Fig. S6** The temperature dependence of density for the 44% crystallinity parylene C.



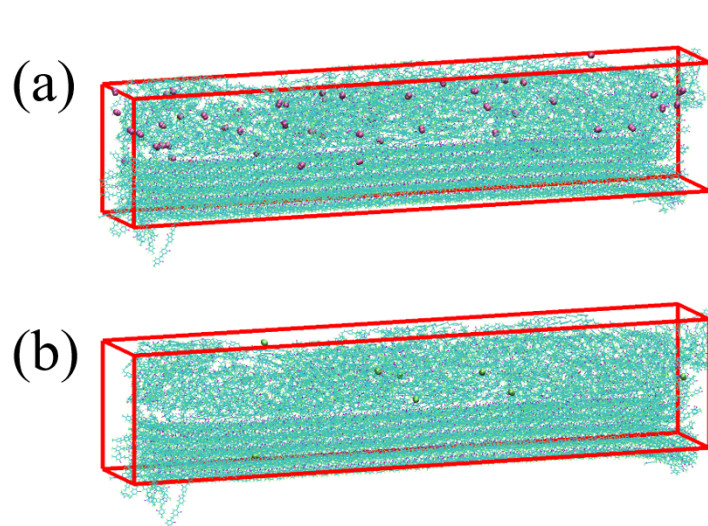

**Fig. S7** The snapshots of (a)  $O_2$  and (b)  $H_2$  adsorbed in parylene C.

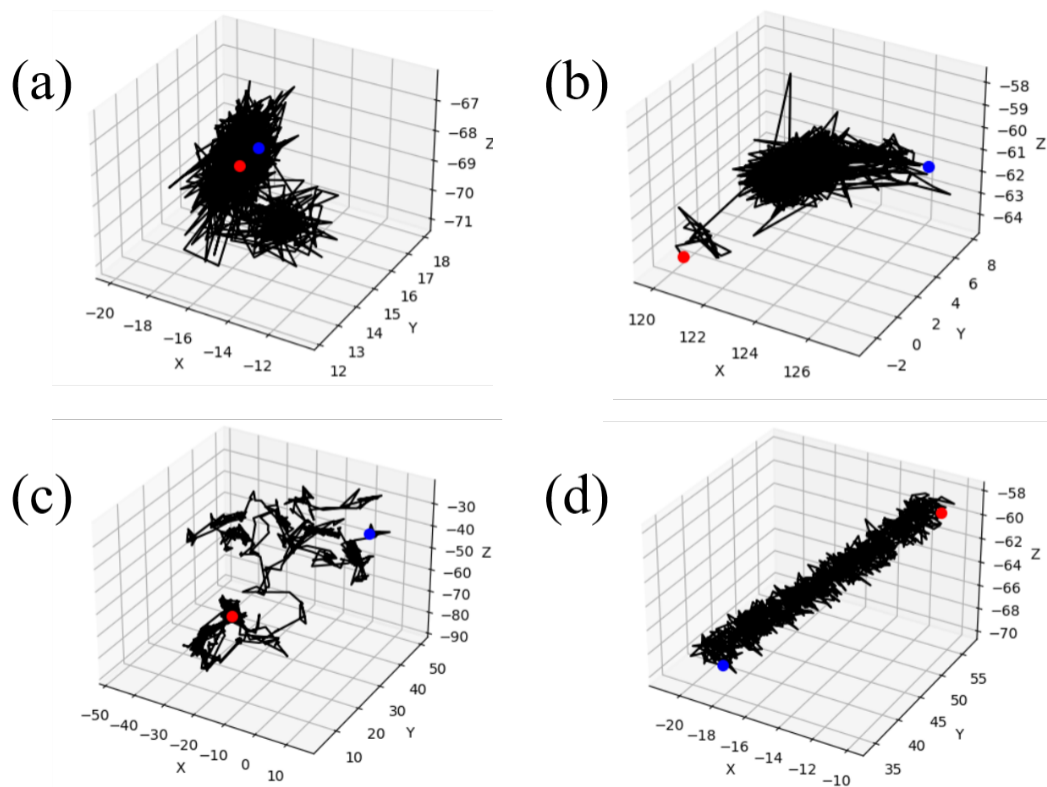

**Fig. S8** One molecule diffusion trajectory of (a) $N_2$ ; (b) $H_2O$ ; (c) $H_2$ ; (d) $O_2$ ; The blue and red dots represent the position of the small molecule gas in the first and last frames, respectively.
